# Supplementary material
Source: publisher figshare collection journal article supplement (https://tandf.figshare.com/ndownloader/files/22386162)
Supplement: Supplementary file 1 [file 22386162]

**One new sesquiterpene pyridine alkaloid from the stems and leaves of *Euonymus fortunei***

**List of Supporting information Pages**

[**Fig. S1. HRESIMS of 1 1**](#_Toc12978296)

[**Fig. S2. UV spectrum of 1 (CH3OH) 1**](#_Toc12978297)

[**Fig. S3. IR spectrum of 1 (KBr disc) 2**](#_Toc12978298)

[**Fig. S4. 1H NMR spectrum of 1 in CD3OD 2**](#_Toc12978299)

[**Fig. S5. 13C NMR spectrum of 1 in CD3OD 3**](#_Toc12978300)

[**Fig. S6. DEPT-135 spectrum of 1 in CD3OD 3**](#_Toc12978301)

[**Fig. S7. 1H-1H COSY spectrum of 1 in CD3OD 4**](#_Toc12978302)

[**Fig. S8. HSQC spectrum of 1 in CD3OD 4**](#_Toc12978303)

[**Fig. S9. HMBC spectrum of 1 in CD3OD 5**](#_Toc12978304)

[**Fig. S10. NOESY spectrum of 1 in CD3OD 5**](#_Toc12978305)

[**Fig. S11. HRESIMS of 2 6**](#_Toc12978306)

[**Fig. S12. UV spectrum of 2 (CH3OH) 6**](#_Toc12978307)

[**Fig. S13. IR spectrum of 2 (KBr disc) 7**](#_Toc12978308)

[**Fig. S14. 1H NMR spectrum of 2 in CD3OD 7**](#_Toc12978309)

[**Fig. S15. 13C NMR spectrum of 2 in CD3OD 8**](#_Toc12978310)

[**Fig. S16. DEPT-135 spectrum of 2 in CD3OD 8**](#_Toc12978311)

[**Fig. S17. HRESIMS of 3 9**](#_Toc12978312)

[**Fig. S18. UV spectrum of 3 (CH3OH) 9**](#_Toc12978313)

[**Fig. S19. IR spectrum of 3 (KBr disc) 10**](#_Toc12978314)

[**Fig. S20. 1H NMR spectrum of 3 in CDCl3 10**](#_Toc12978316)

[**Fig. S21. 13C NMR spectrum of 3 in CDCl3 11**](#_Toc12978317)

[**Fig. S22. DEPT-135 spectrum of 3 in CDCl3 11**](#_Toc12978318)

[**Fig. S23. HRESIMS of 4 12**](#_Toc12978319)

[**Fig. S24. UV spectrum of 4 (CH3OH) 12**](#_Toc12978320)

[**Fig. S25. IR spectrum of 4 (KBr disc) 13**](#_Toc12978321)

[**Fig. S26. 1H NMR spectrum of 4 in CDCl3 13**](#_Toc12978322)

[**Fig. S27. 13C NMR spectrum of 4 in CDCl3 14**](#_Toc12978323)

[**Fig. S28. DEPT-135 spectrum of 4 in CDCl3 14**](#_Toc12978324)

[**Fig. S29. HRESIMS of 5 15**](#_Toc12978325)

[**Fig. S30. UV spectrum of 5 (CH3OH) 15**](#_Toc12978326)

[**Fig. S31. IR spectrum of 5 (KBr disc) 16**](#_Toc12978327)

[**Fig. S32. 1H NMR spectrum of 5 in CD3OD 16**](#_Toc12978328)

[**Fig. S33. 13C NMR spectrum of 5 in CD3OD 17**](#_Toc12978329)

[**Fig. S34. DEPT-135 spectrum of 5 in CD3OD 17**](#_Toc12978330)


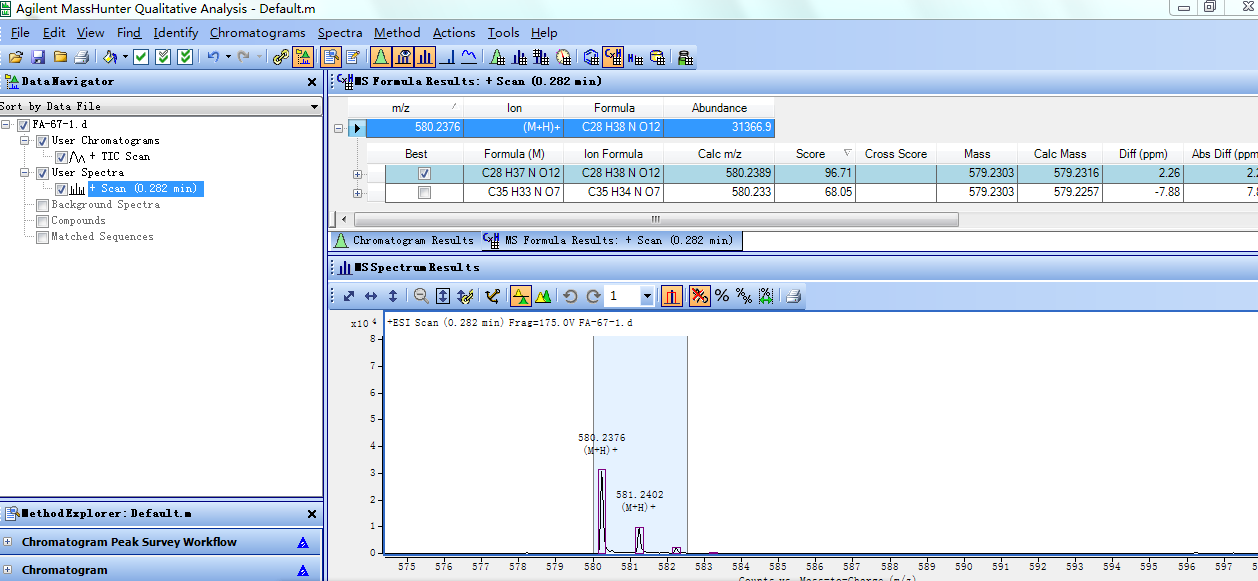


# Fig. S1. HRESIMS of 1


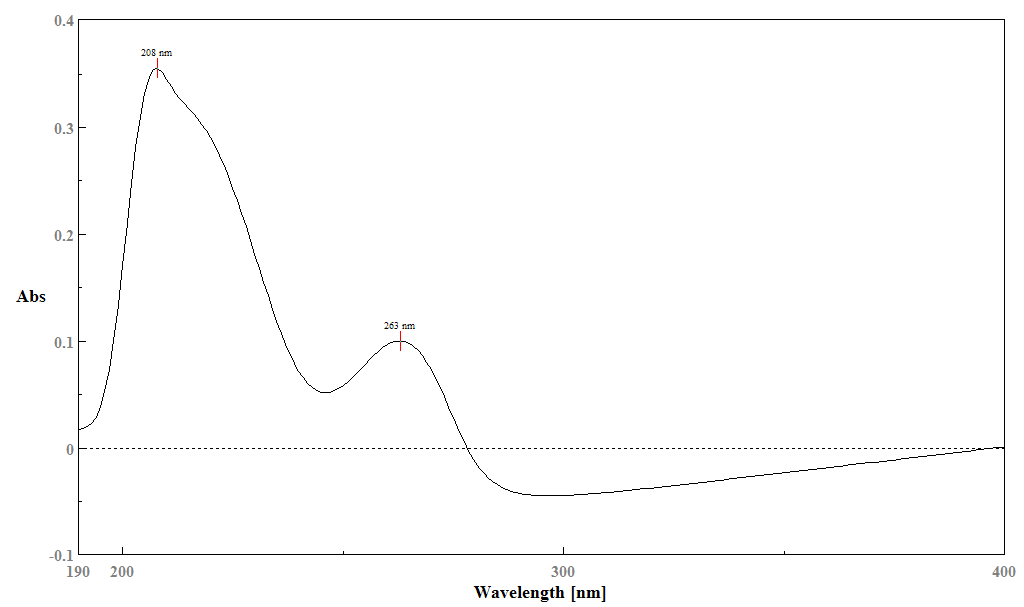


# Fig. S2. UV spectrum of 1 (CH3OH)

# Fig. S3. IR sectrum of 1 (KBr disc)


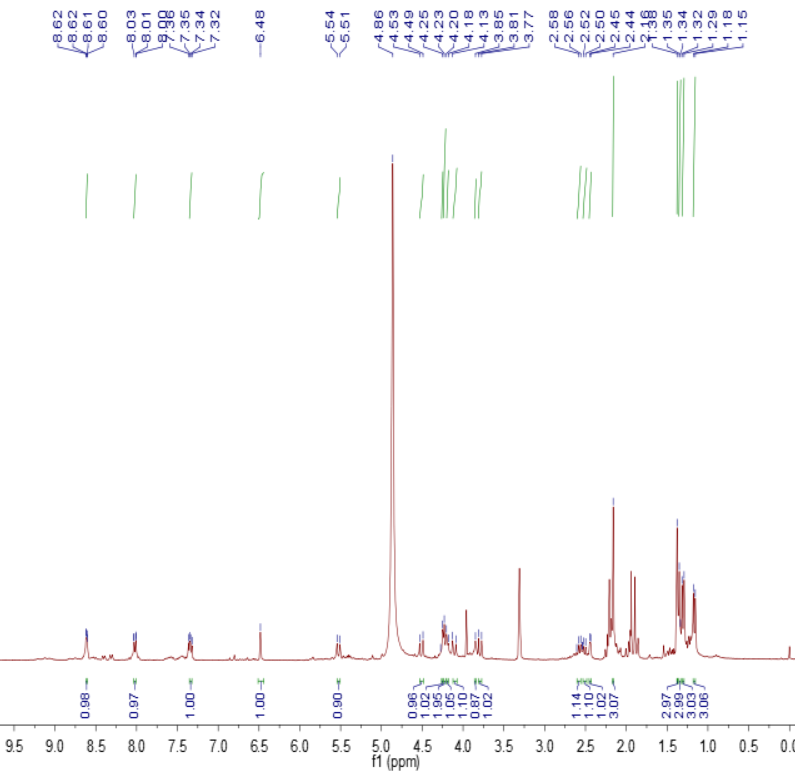


# Fig. S4. 1H NMR spectrum of 1 in CD3OD


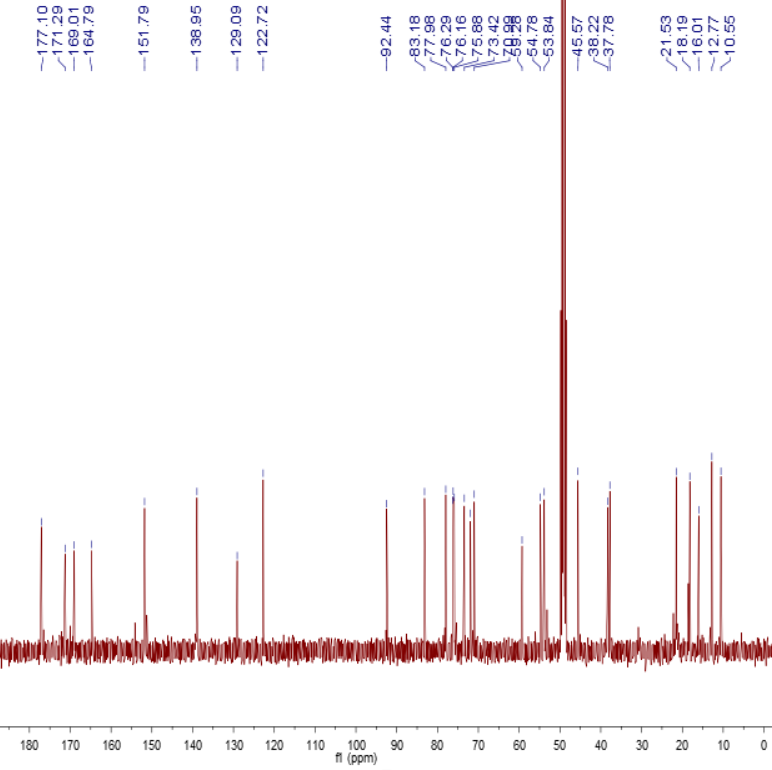


# Fig. S5. 13C NMR spectrum of 1 in CD3OD


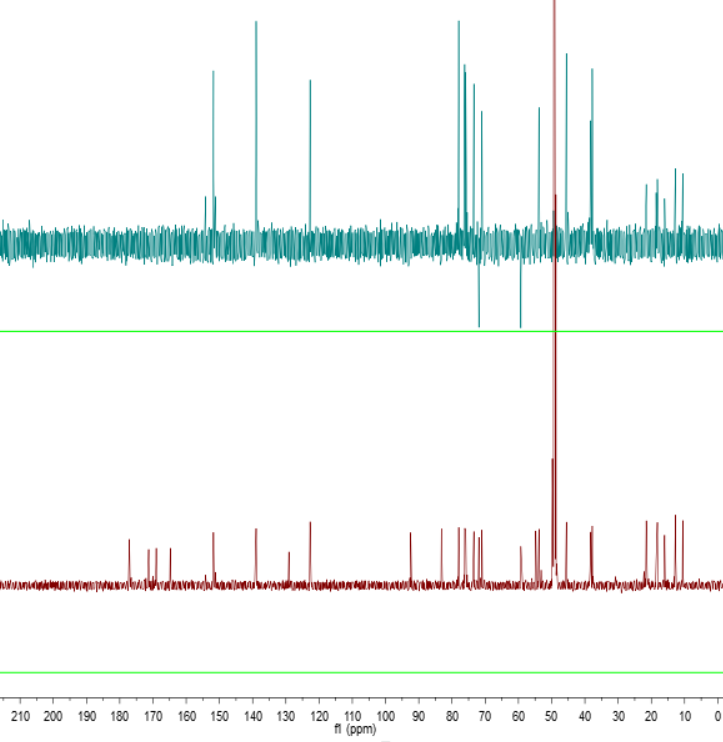


# Fig. S6. DEPT-135 spectrum of 1 in CD3OD


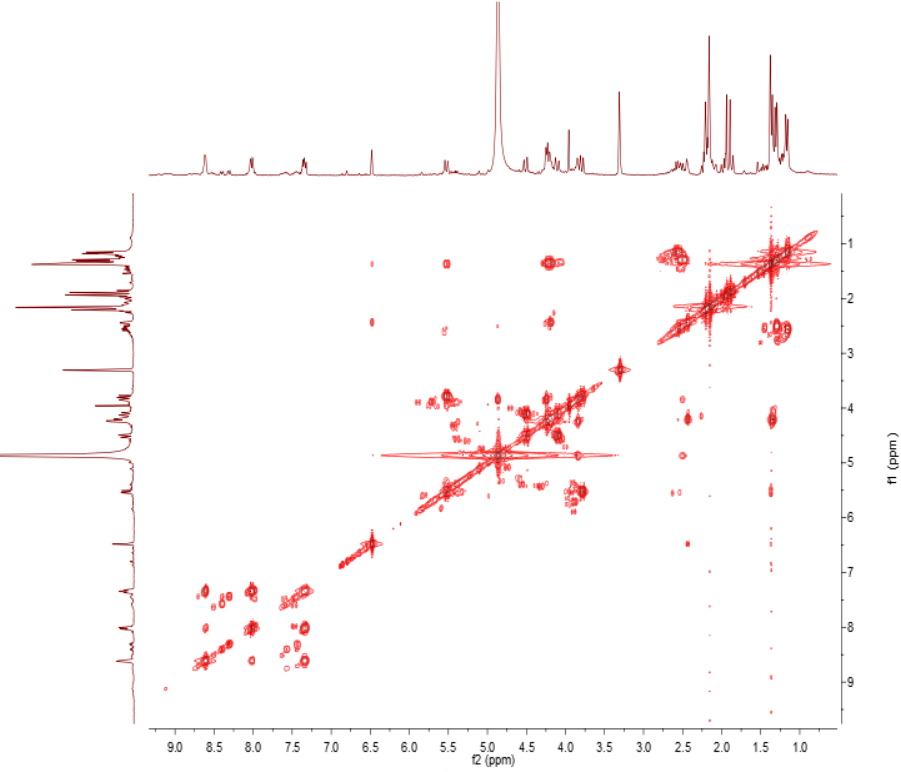


# Fig. S7. 1H-1H COSY spectrum of 1 in CD3OD


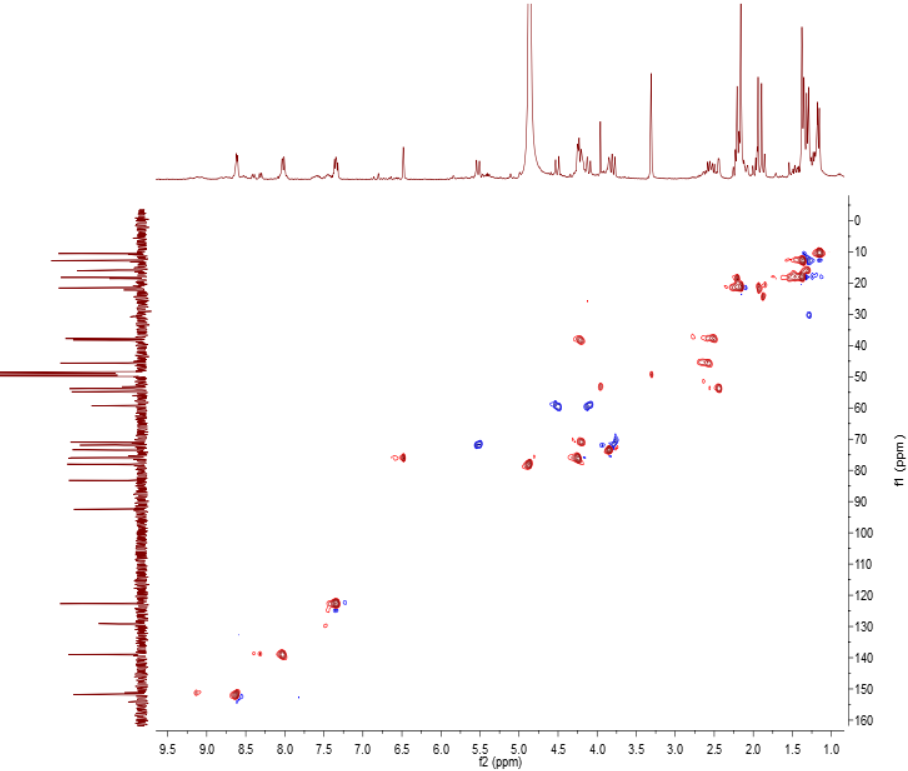


# Fig. S8. HSQC spectrum of 1 in CD3OD


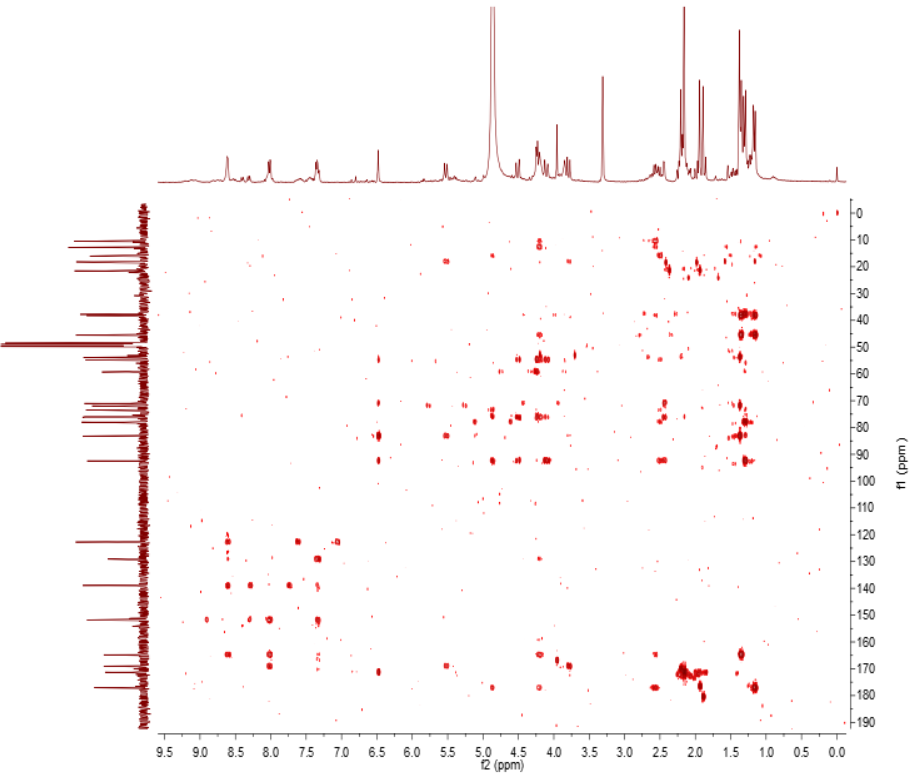


# Fig. S9. HMBC spectrum of 1 in CD3OD


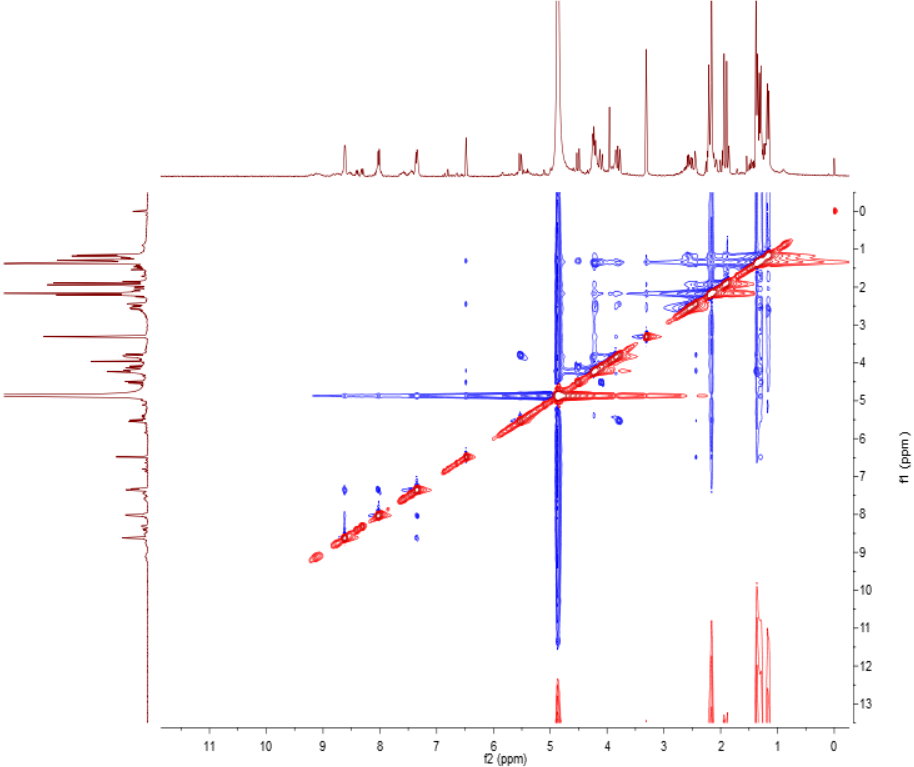


# Fig. S10. NOESY spectrum of 1 in CD3OD


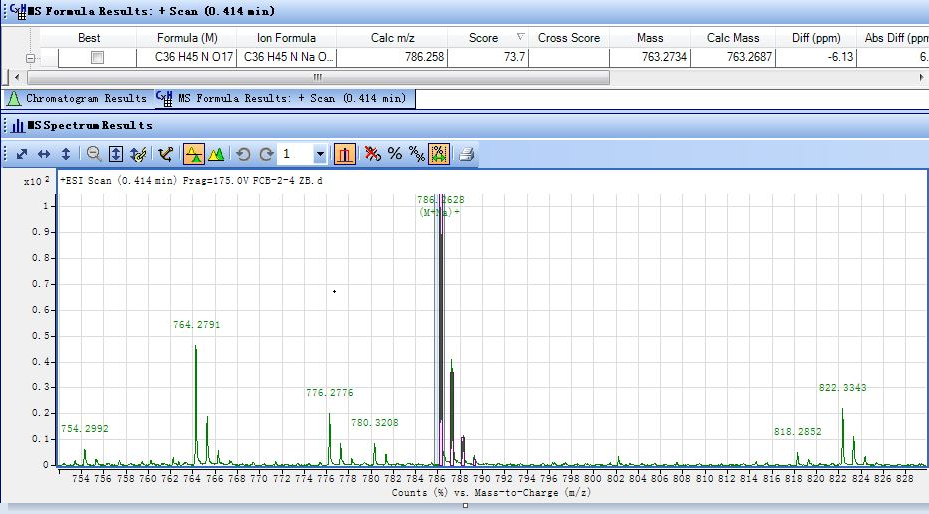


# Fig. S11. HRESIMS of 2


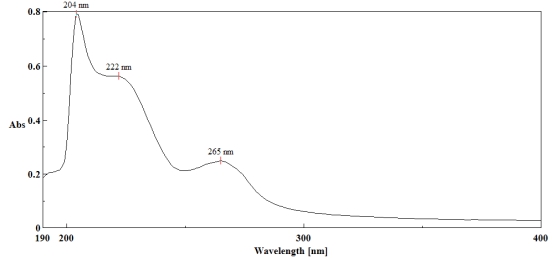


# Fig. S12. UV spectrum of 2 (CH3OH)


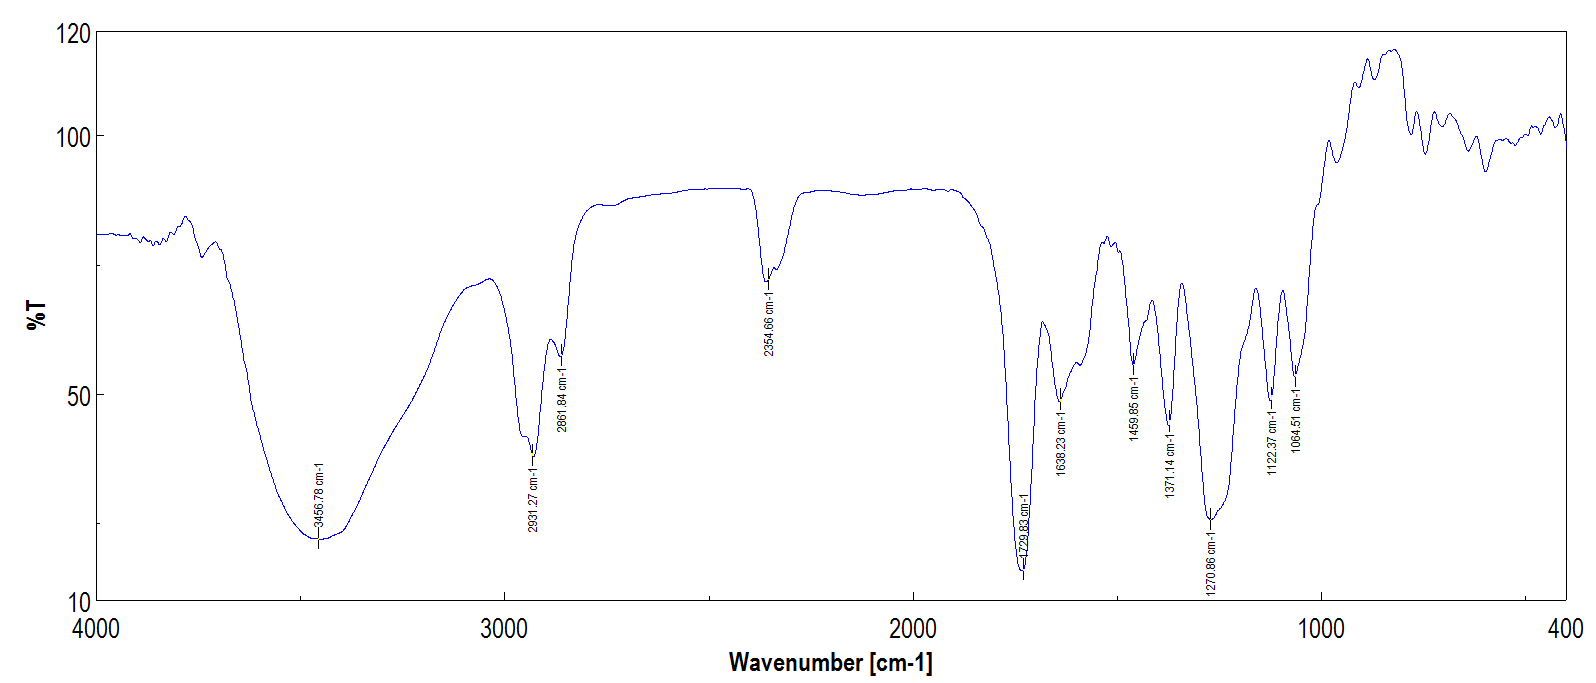


# Fig. S13. IR sectrum of 2 (KBr disc)


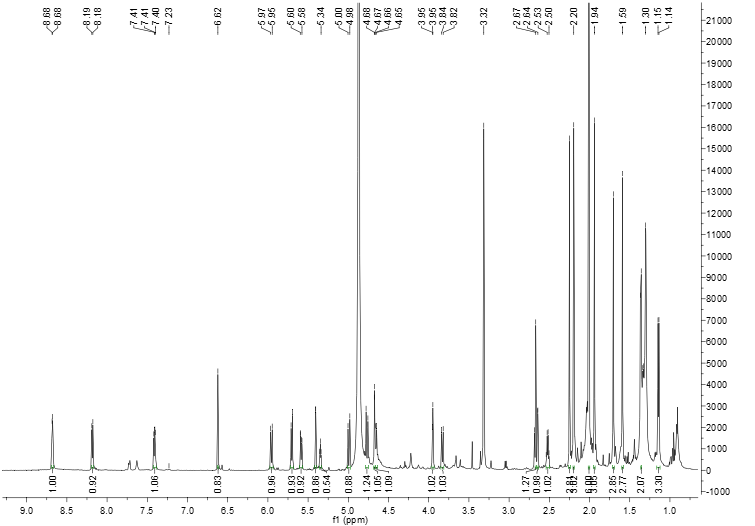


# Fig. S14. 1H NMR spectrum of 2 in CD3OD


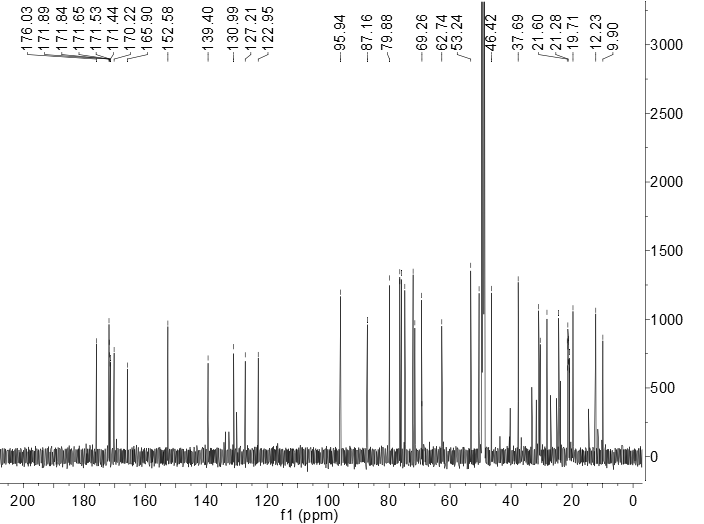


# Fig. S15. 13C NMR spectrum of 2 in CD3OD


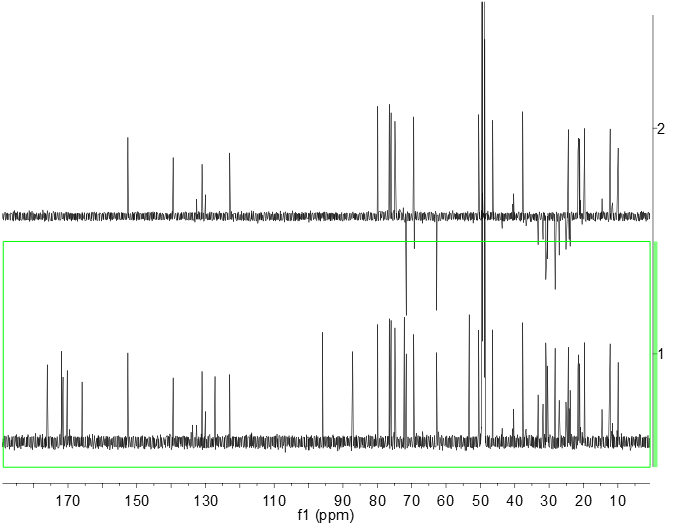


# Fig. S16. DEPT-135 spectrum of 2 in CD3OD

**
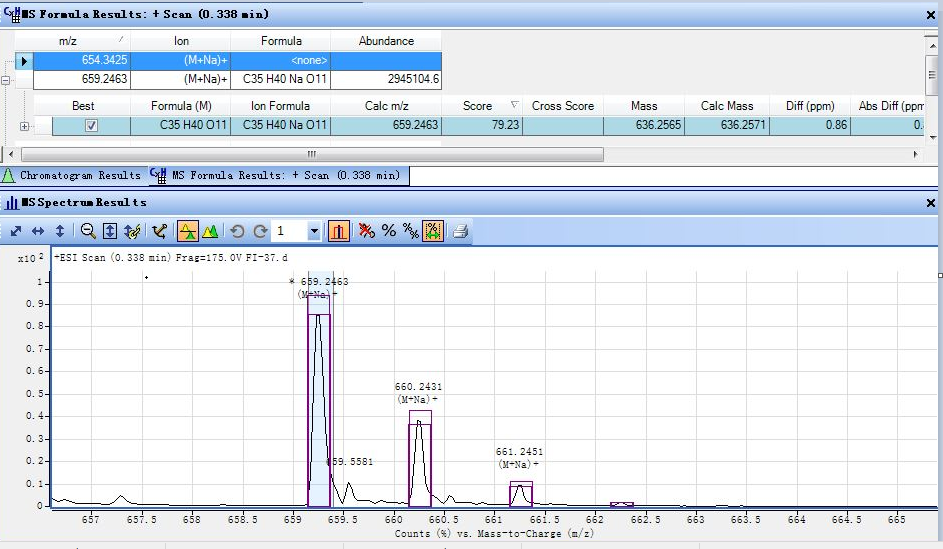
**

# Fig. S17. HRESIMS of 3


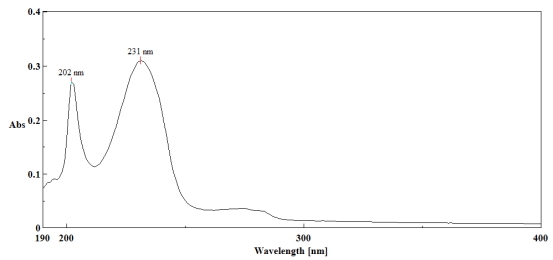


# Fig. S18. UV spectrum of 3 (CH3OH)


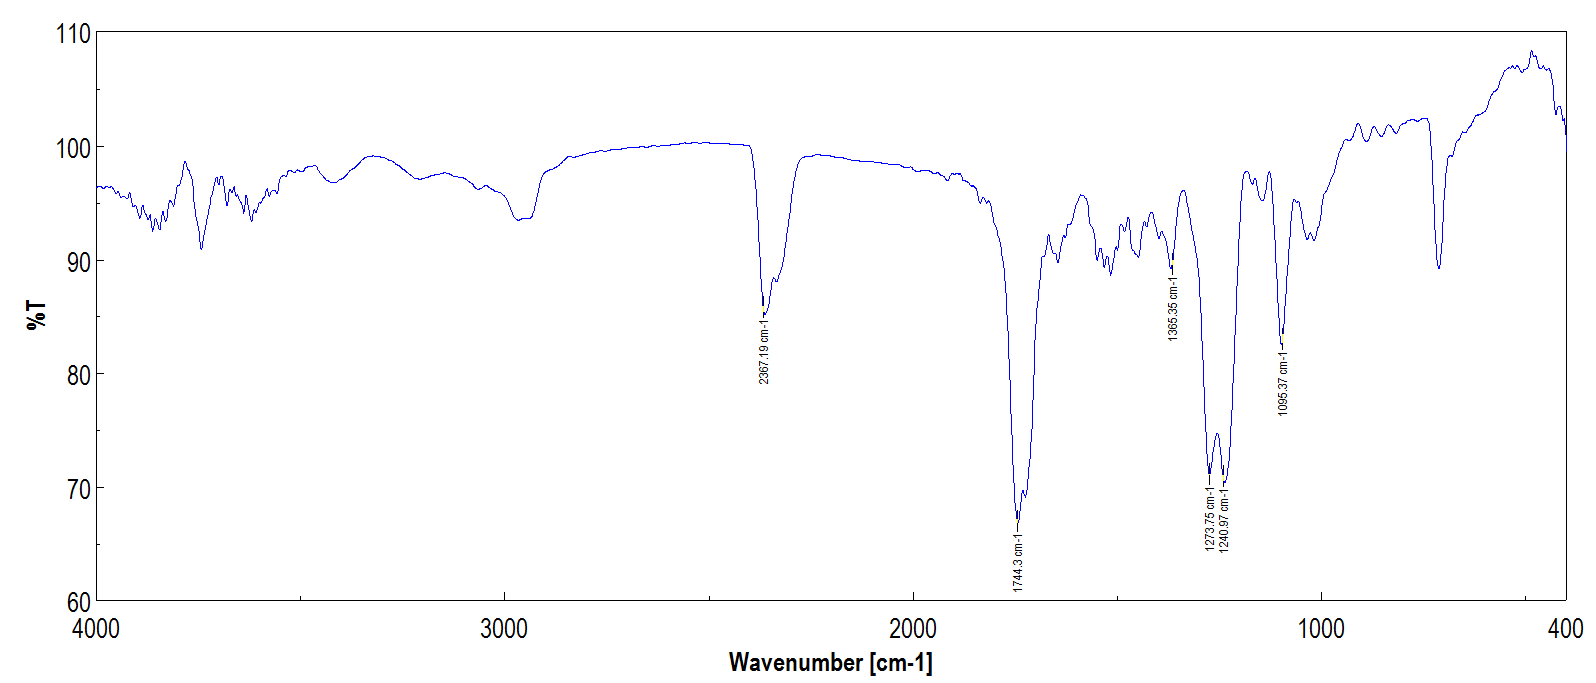


# Fig. S19. IR sectrum of 3 (KBr disc)


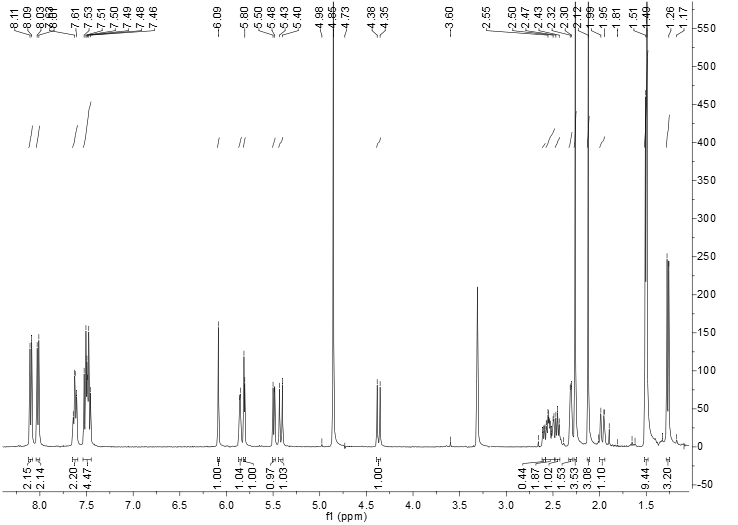


# Fig. S20. 1H NMR spectrum of 3 in CDCl3


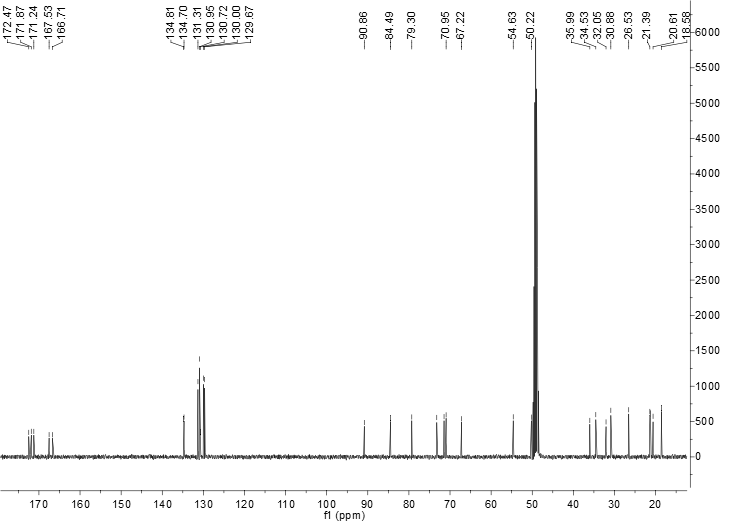


# Fig. S21. 13C NMR spectrum of 3 in CDCl3


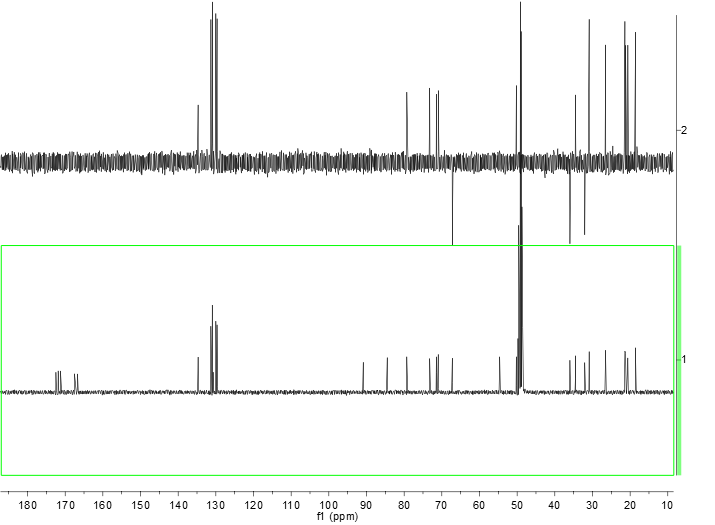


# Fig. S22. DEPT-135 spectrum of 3 in CDCl3


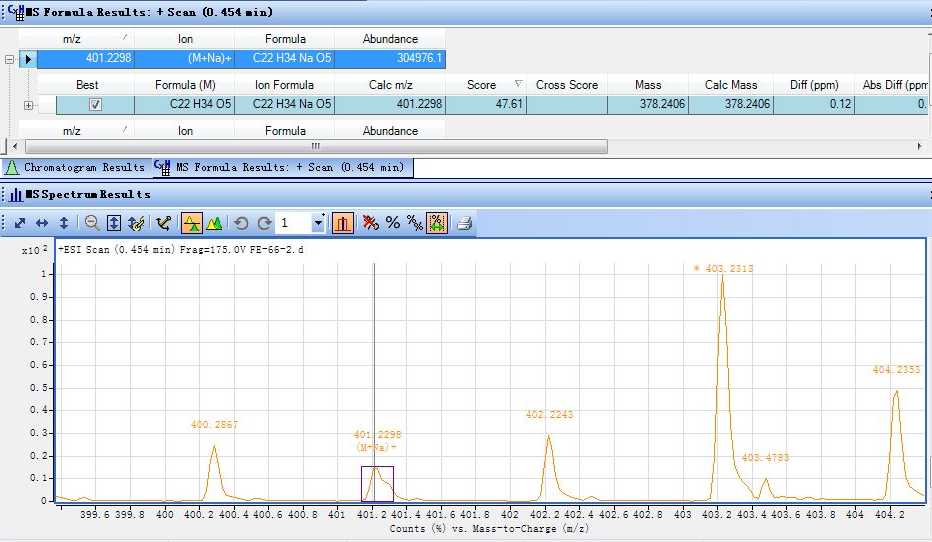


# Fig. S23. HRESIMS of 4


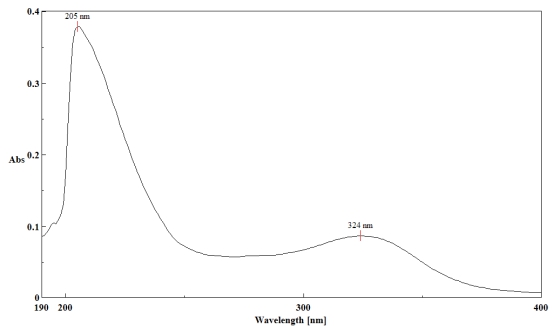


# Fig. S24. UV spectrum of 4 (CH3OH)


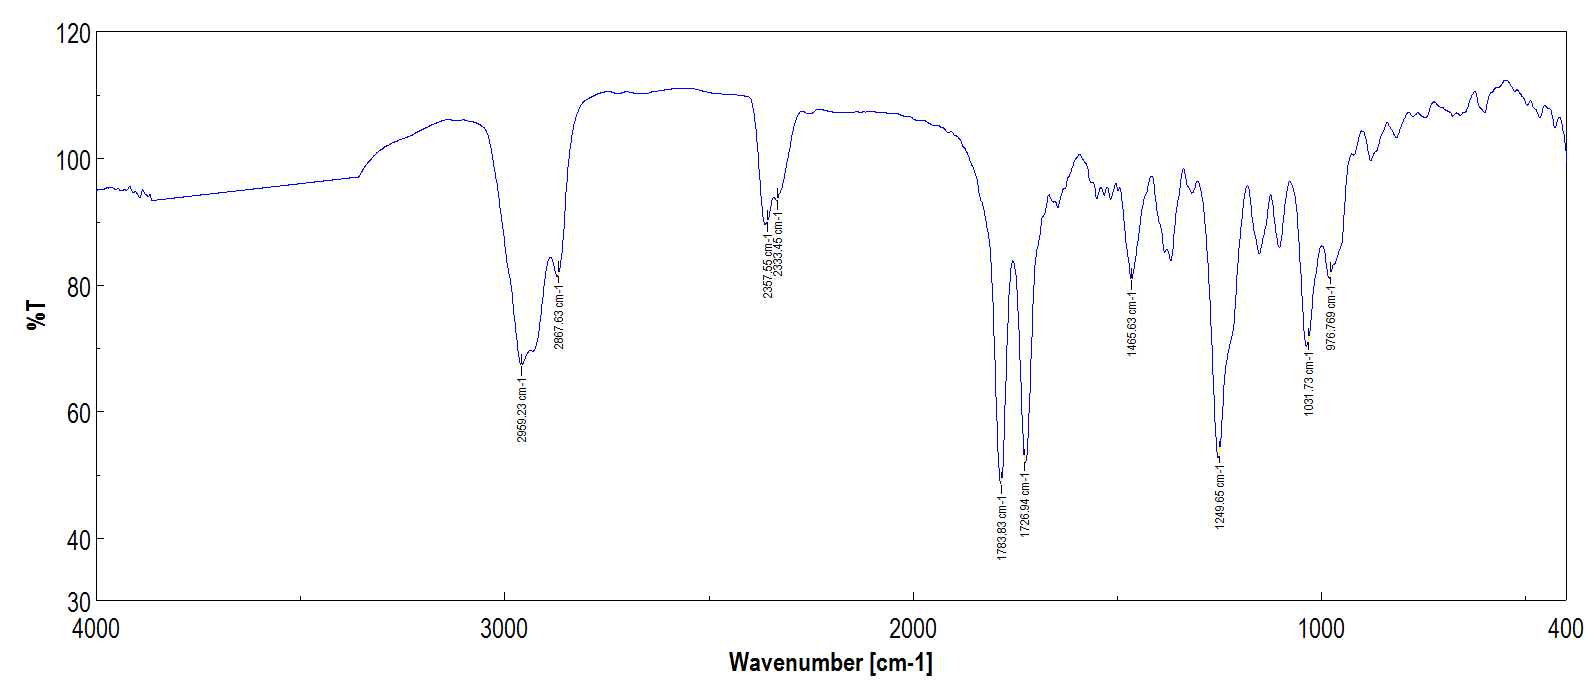


# Fig. S25. IR sectrum of 4 (KBr disc)


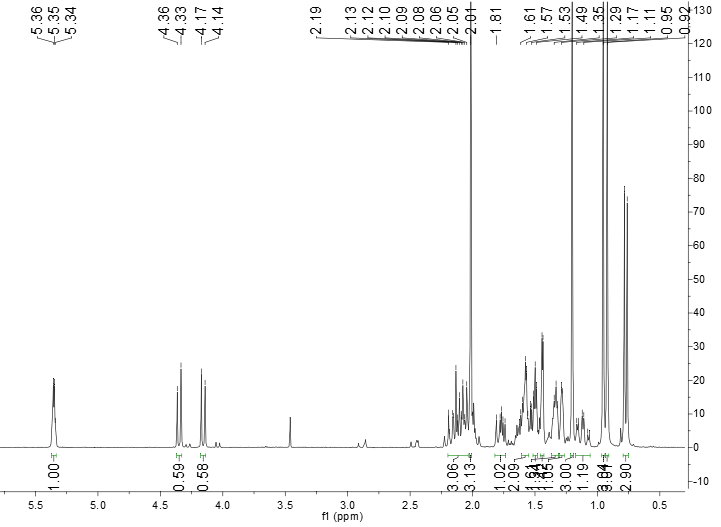


# Fig. S26. 1H NMR spectrum of 4 in CDCl3


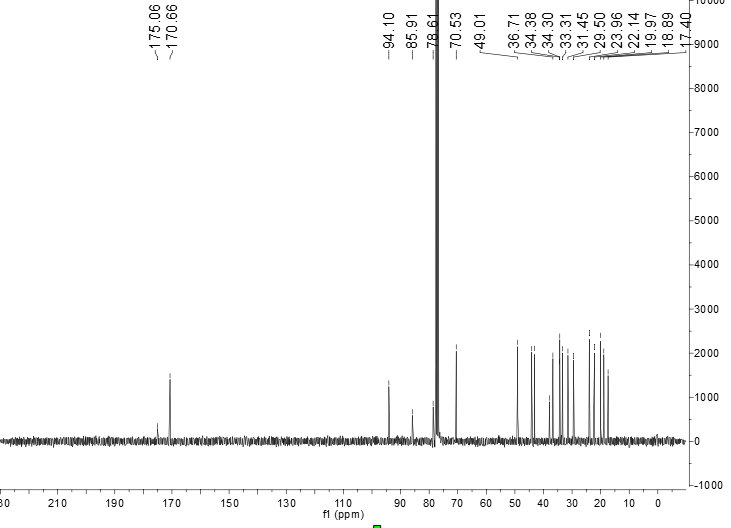


# Fig. S27. 13C NMR spectrum of 4 in CDCl3


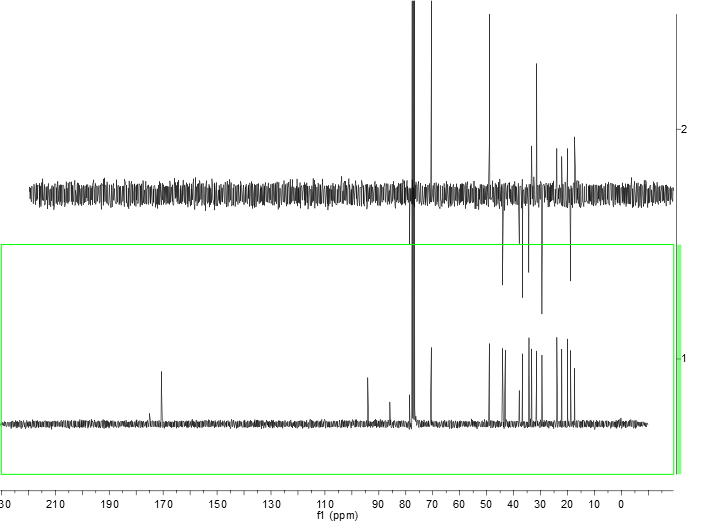


# Fig. S28. DEPT-135 spectrum of 4 in CDCl3


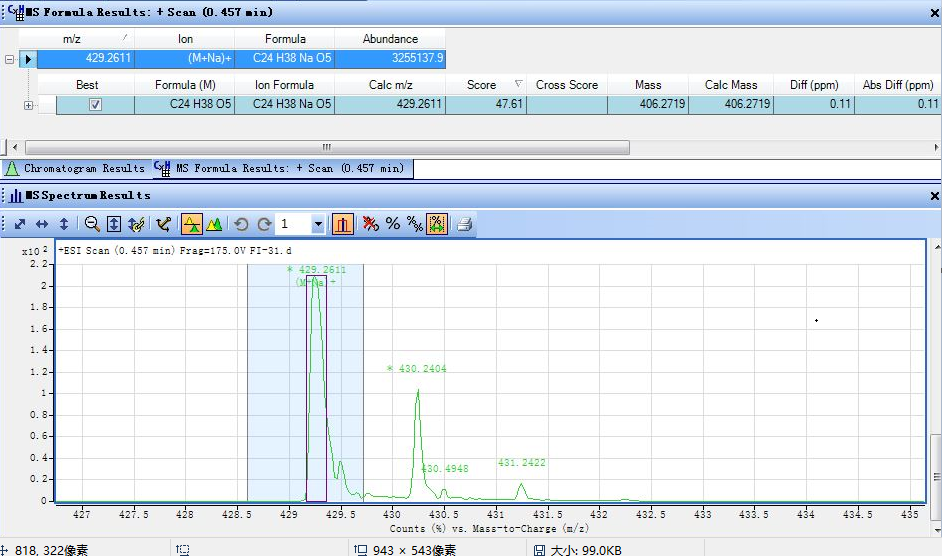


# Fig. S29. HRESIMS of 5


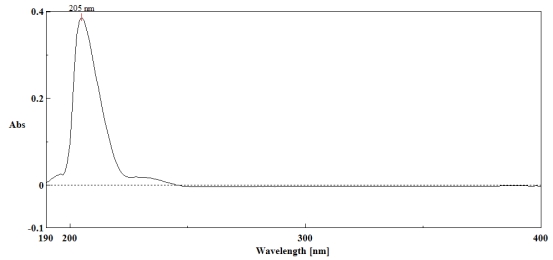


# Fig. S30. UV spectrum of 5 (CH3OH)


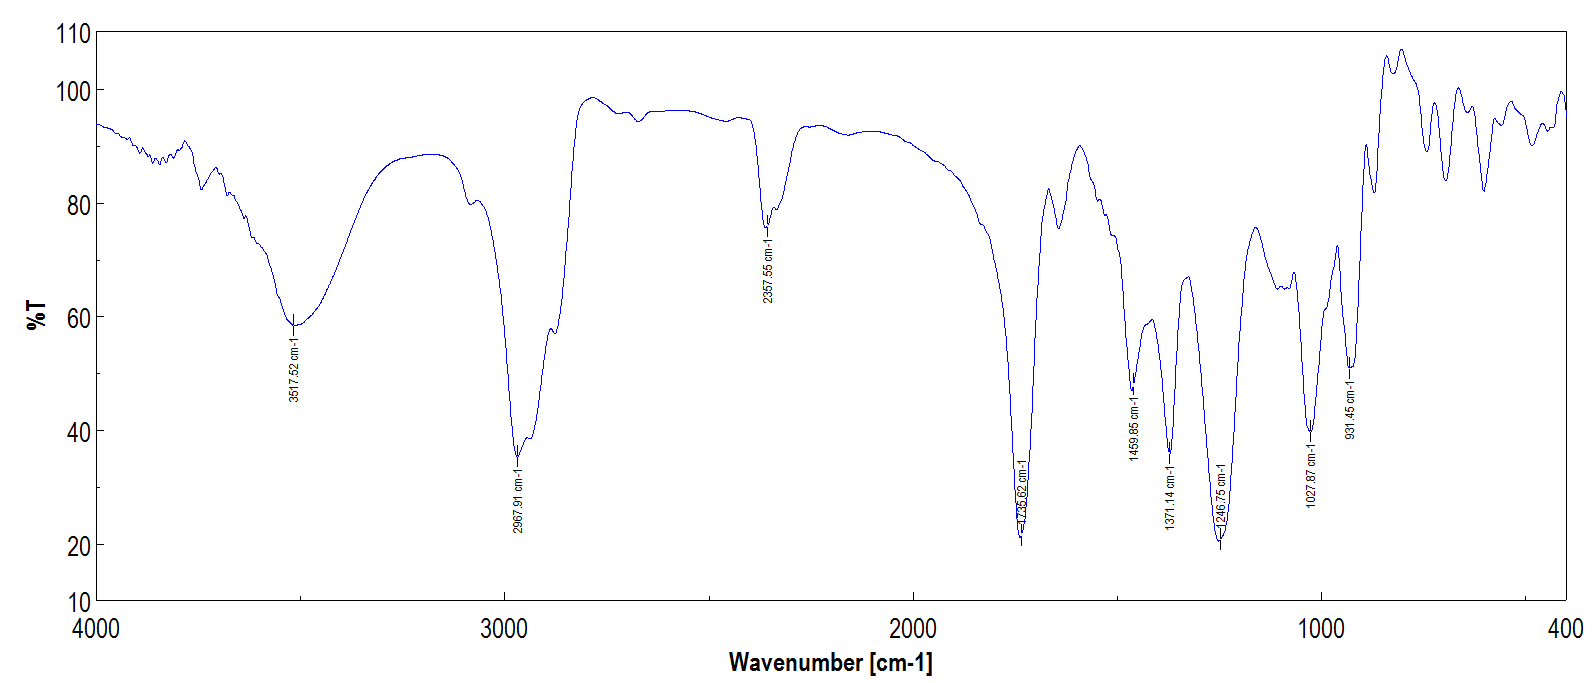


# Fig. S31. IR sectrum of 5 (KBr disc)


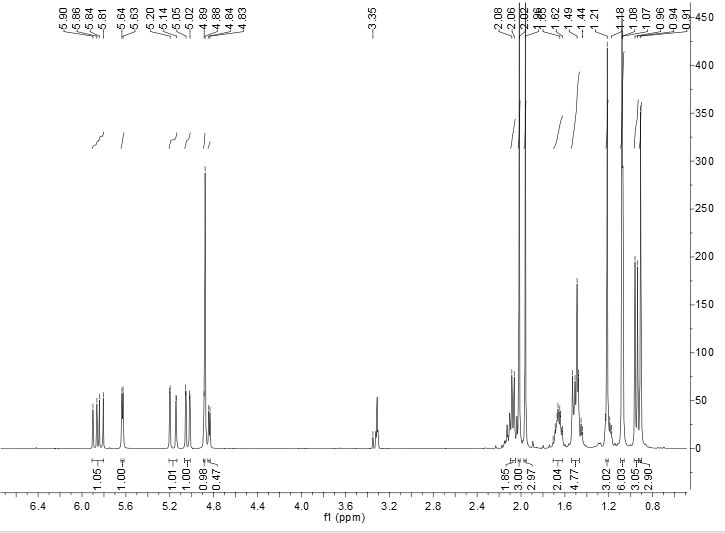


# Fig. S32. 1H NMR spectrum of 5 in CD3OD


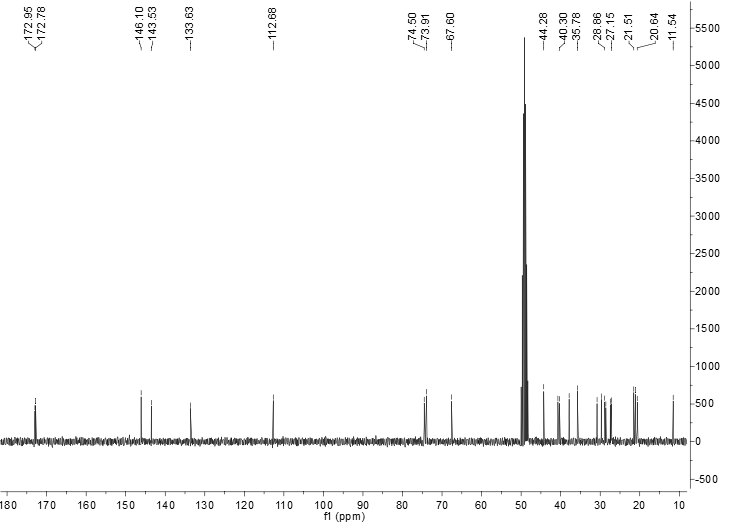


# Fig. S33. 13C NMR spectrum of 5 in CD3OD


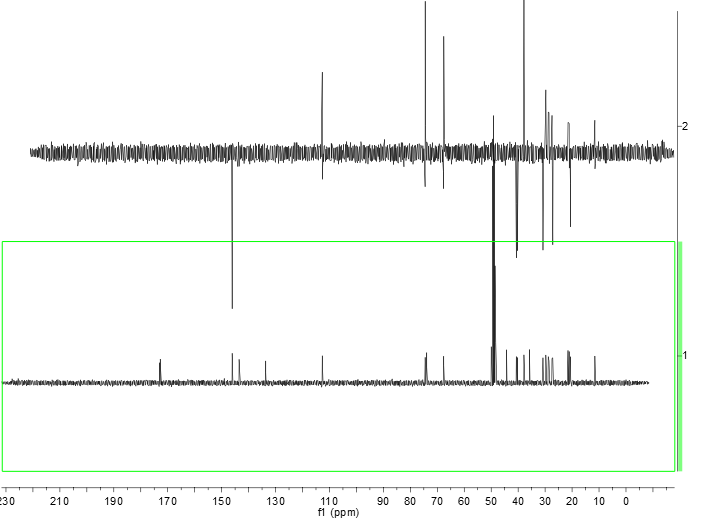


# Fig. S34. DEPT-135 spectrum of 5 in CD3OD
